# Supplementary material for: Cost-effectiveness Analysis of Maternal Immunization with RSVpreF Vaccine for the Prevention of Respiratory Syncytial Virus Among Infants in Spain
Source: Springer Nature journal article supplement (doi:10.1007/s40121-024-00975-6), 2024-05-11
Supplement: MOESM1 [file 27078970]

# **Cost-effectiveness analysis of maternal immunization with RSVpreF vaccine for prevention of Respiratory Syncytial Virus among infants in Spain**

**Authors:** Javier Álvarez Aldean<sup>1</sup>; Irene Rivero Calle<sup>2</sup>; Rosa Rodríguez Fernández<sup>3</sup>; Susana Aceituno Mata<sup>4</sup>; Alba Bellmunt<sup>4</sup>; Miriam Prades<sup>4</sup>; Amy W. Law<sup>5</sup>; Alejandra López-Ibáñez de Aldecoa<sup>6</sup>; Cristina Méndez<sup>6</sup>; María L. García Somoza<sup>6</sup>; Javier Soto<sup>7</sup>; Virginia Lozano<sup>6</sup>

## **Affiliation:**

1. Hospital Costa del Sol, Marbella, Málaga, Spain
2. Hospital Clínico Universitario de Santiago de Compostela, A Coruña, Spain
3. Hospital Gregorio Marañón, Madrid, Spain
4. Outcomes'10 S.L., Castellón de la Plana, Castellón, Spain
5. Pfizer, Inc., New York, United States
6. Pfizer S.L.U, Alcobendas, Madrid, Spain
7. Former Pfizer S.L.U employee, Madrid, Spain

## **Corresponding author:**

Alba Bellmunt

Market Access, Outcomes'10, Avda Vicente sos banyat, s/n Espaitec 2, 3<sup>a</sup> planta,  
12006, Castellón, Spain

Email: [abellmunt@outcomes10.com](mailto:abellmunt@outcomes10.com)

## SUPPLEMENTARY MATERIAL

**Supplementary Table S1. Relative rate of RSV by age and term status**

| Term status                      | Age (months) |        |         | Reference             |
|----------------------------------|--------------|--------|---------|-----------------------|
|                                  | 0 - <3       | 3 - <6 | 6 - <12 |                       |
| Full term ( $\geq 37$ wGA)       | 1.0          | 1.0    | 1.0     | Rha et al.<br>2020[1] |
| Late preterm (32-36 wGA)         | 1.7          | 2.5    | 1.7     |                       |
| Early preterm (28-31 wGA)        | 0.5          | 2.4    | 6.8     |                       |
| Extreme preterm ( $\leq 27$ wGA) | 0.5          | 2.4    | 6.8     |                       |

wGA: week of gestational age

**Supplementary Table S2. Distribution of RSV cases by calendar month**

| Calendar month | Distribution of RSV cases | Reference |
|----------------|---------------------------|-----------|
| January        | 39.2%                     | ISCIII[2] |
| February       | 15.8%                     |           |
| March          | 6.4%                      |           |
| April          | 1.3%                      |           |
| May            | 0.1%                      |           |
| June           | 0.3%                      |           |
| July           | 0.1%                      |           |
| August         | 0.1%                      |           |
| September      | 0.0%                      |           |
| October        | 0.8%                      |           |
| November       | 7.6%                      |           |
| December       | 28.3%                     |           |

ISCIII: Instituto de Salud Carlos III; RSV: respiratory syncytial virus

**Supplementary Table S3. General infant mortality rate (per 1,000 live births) by age**

| Age (months) | Infant mortality rate [3] |
|--------------|---------------------------|
| <1           | 1.87                      |
| 1- <2        | 0.3                       |
| 2 - <3       | 0.11                      |
| 3 - <4       | 0.07                      |
| 4 - <5       | 0.07                      |
| 5 - <6       | 0.07                      |
| 6 - <7       | 0.06                      |
| 7 - <8       | 0.05                      |

|                    |      |
|--------------------|------|
| <b>8 - &lt;9</b>   | 0.05 |
| <b>9 - &lt;10</b>  | 0.03 |
| <b>10 - &lt;11</b> | 0.02 |
| <b>11 - &lt;12</b> | 0.03 |

**Supplementary Table S4. Variables and probability distributions used in the probabilistic model**

| <b>Variable</b>                       | <b>Distribution</b> | <b>Alpha</b> | <b>Beta</b> |
|---------------------------------------|---------------------|--------------|-------------|
| <b>Disease incidence</b>              |                     |              |             |
| RSV Hospitalization                   | <b>Beta</b>         | 428.00       | 7,198.00    |
| RSV ED encounters                     |                     | 687.00       | 6,939.00    |
| RSV PC encounters                     |                     | 991.00       | 6,635.00    |
| <b>RSV-related mortality</b>          | <b>Beta</b>         | 154.00       | 110,075.00  |
| <b>Maternal vaccine effectiveness</b> | <b>Beta</b>         | 18.02        | 4.02        |
| <b>Disutility due to</b>              |                     |              |             |
| RSV Hospitalization                   | <b>Beta</b>         | 5.74         | 359.26      |
| RSV ED encounters                     |                     | 2.24         | 362.76      |
| RSV PC encounters                     |                     | 2.24         | 362.76      |
|                                       |                     | <b>Mean</b>  | <b>SE</b>   |
| <b>Direct costs of disease</b>        |                     |              |             |
| RSV Hospitalization                   | <b>Log-Normal</b>   | 3,487.35     | 154.80      |
| RSV ED encounters                     |                     | 408.00       | 12.50       |
| RSV PC encounters                     |                     | 486.00       | 20.85       |

ED: emergency department; PC: primary care; RSV: respiratory syncytial virus; SE: standard error

## REFERENCES

1. Rha B, Curns AT, Lively JY, Campbell AP, Englund JA, Boom JA, et al. Respiratory Syncytial Virus-Associated Hospitalizations Among Young Children: 2015-2016. *Pediatrics*. 2020;146(1).
2. Instituto de Salud Carlos III. Vigilancia en salud pública-RENAVE. Temporada 2018-2019. Disponible en: [https://www.isciii.es/QueHacemos/Servicios/VigilanciaSaludPublicaRENAVE/EnfermedadesTransmisibles/Paginas/Temporada\\_Gripe\\_2018-19.aspx](https://www.isciii.es/QueHacemos/Servicios/VigilanciaSaludPublicaRENAVE/EnfermedadesTransmisibles/Paginas/Temporada_Gripe_2018-19.aspx). Accedido en junio, 2023.
3. "Statistics National Institute (INE)", <https://www.ine.es/>, 2019.
